# Supplementary material for: Ephedra foeminea as a Novel Source of Antimicrobial and Anti-Biofilm Compounds to Fight Multidrug Resistance Phenotype
Source: MDPI journal article supplement (doi:10.3390/ijms24043284), 2023-02-07
Supplement: s1 [file s1]

## SUPPORTING INFORMATION

# *Ephedra foeminea* as a Novel Source of Antimicrobial and Anti-Biofilm Compounds to Fight Multidrug Resistance Phenotype

Shurooq Ismail <sup>1,2</sup>, Rosa Gaglione <sup>1,3</sup>, Marco Masi <sup>1</sup>, Srichandan Padhi <sup>4</sup>, Amit K. Rai <sup>4</sup>, Ghadeer Omar <sup>2</sup>, Alessio Cimmino <sup>1,\*</sup> and Angela Arciello <sup>1,3,\*</sup>

<sup>1</sup> Department of Chemical Sciences, University of Naples Federico II, Via Cintia 21, I-80126 Naples, Italy

<sup>2</sup> Department of Biology and Biotechnology, An-Najah National University, Nablus 97300, Palestine

<sup>3</sup> Istituto Nazionale di Biostrutture e Biosistemi (INBB), 00136 Rome, Italy

<sup>4</sup> Institute of Bioresources and Sustainable Development, Imphal, Manipur 795004, India

\* Correspondence: alessio.cimmino@unina.it (A.C.); anarciel@unina.it (A.A.)

## Supporting information list

**Supplementary Table S1.** Minimal Inhibitory Concentration (MIC<sub>100</sub>) values (mg/mL) determined for fractions obtained upon extraction in hexane and two sequential steps of column chromatography.

**Supplementary Figure S1.** <sup>1</sup>H NMR spectrum of carvacrol, **compound 1** (CDCl<sub>3</sub>, 400 MHz).

**Supplementary Figure S2.** <sup>1</sup>H NMR spectrum of thymol, **compound 2** (CDCl<sub>3</sub>, 400 MHz).

**Supplementary Figure S3.** <sup>1</sup>H NMR spectrum of kaempferol-3-*O*- $\alpha$ -L-(2'',4''-di-*E*-*p*-coumaroyl)-rhamnoside, **compound 3** (MeOD, 400 MHz).

**Supplementary Figure S4.** <sup>1</sup>H NMR spectrum of kaempferol-3-*O*- $\alpha$ -L-(2'',4''-di-*E*-*p*-coumaroyl)-rhamnoside, **compound 3** (MeOD, 400 MHz) in the range 8.1 to 5.4 ppm.

**Supplementary Figure S5.** <sup>1</sup>H NMR spectrum of kaempferol-3-*O*- $\alpha$ -L-(2'',4''-di-*E*-*p*-coumaroyl)-rhamnoside, **compound 3** (acetone-*d*<sub>6</sub>, 400 MHz).

**Supplementary Figure S6.** <sup>1</sup>H NMR spectrum of kaempferol-3-*O*- $\alpha$ -L-(2'',4''-di-*E*-*p*-coumaroyl)-rhamnoside, **compound 3** (acetone-*d*<sub>6</sub>, 400 MHz) in the range 8.0 to 5.5 ppm.

**Supplementary Figure S7.** COSY spectrum of kaempferol-3-*O*- $\alpha$ -L-(2'',4''-di-*E*-*p*-coumaroyl)-rhamnoside, **compound 3** (acetone-*d*<sub>6</sub>, 400 MHz).

**Supplementary Figure S8.** COSY spectrum of kaempferol-3-*O*- $\alpha$ -L-(2'',4''-di-*E*-*p*-coumaroyl)-rhamnoside, **compound 3** (acetone-*d*<sub>6</sub>, 400 MHz) in the range 8.0 to 5.6 ppm.

**Supplementary Figure S9.** NOESY spectrum of kaempferol-3-*O*- $\alpha$ -L-(2'',4''-di-*E*-*p*-coumaroyl)-rhamnoside, **compound 3** (acetone-*d*<sub>6</sub>, 400 MHz).

**Supplementary Figure S10.** <sup>13</sup>C NMR spectrum of kaempferol-3-*O*- $\alpha$ -L-(2'',4''-di-*E*-*p*-coumaroyl)-rhamnoside, **compound 3** (acetone-*d*<sub>6</sub>, 400 MHz).

**Supplementary Figure S11.** HSQC spectrum of kaempferol-3-*O*- $\alpha$ -L-(2'',4''-di-*E*-*p*-coumaroyl)-rhamnoside, **compound 3** (acetone-*d*<sub>6</sub>, 400 MHz).

**Supplementary Figure S12.** HMBC spectrum of kaempferol-3-*O*- $\alpha$ -L-(2'',4''-di-*E*-*p*-coumaroyl)-rhamnoside, **compound 3** (acetone-*d*<sub>6</sub>, 400 MHz).

**Supplementary Figure S13.** ESI MS spectrum of kaempferol-3-*O*- $\alpha$ -L-(2'',4''-di-*E*-*p*-coumaroyl)-rhamnoside, **compound 3** recorded in positive modality.

**Supplementary Figure S14.** <sup>1</sup>H NMR spectrum of kaempferol-3-*O*- $\alpha$ -L-(2''-*E*-*p*-coumaroyl,4''-*Z*-*p*-coumaroyl)-rhamnoside, **compound 4** (MeOD, 400 MHz).

**Supplementary Figure S15.** <sup>1</sup>H NMR spectrum of kaempferol-3-*O*- $\alpha$ -L-(2''-*E*-*p*-coumaroyl,4''-*Z*-*p*-coumaroyl)-rhamnoside, **compound 4** (MeOD, 400 MHz) in the range 8.0 to 5.3 ppm.

**Supplementary Figure S16.** COSY spectrum of kaempferol-3-*O*- $\alpha$ -L-(2''-*E*-*p*-coumaroyl,4''-*Z*-*p*-coumaroyl)-rhamnoside, **compound 4** (acetone-*d*<sub>6</sub>, 400 MHz).

**Supplementary Figure S17.** <sup>1</sup>H NMR spectrum of kaempferol-3-*O*- $\alpha$ -L-(2''-*E*-*p*-coumaroyl,4''-*Z*-*p*-coumaroyl)-rhamnoside, **compound 4** (acetone-*d*<sub>6</sub>, 400 MHz).

**Supplementary Figure S18.** <sup>1</sup>H NMR spectrum of kaempferol-3-*O*- $\alpha$ -L-(2''-*E*-*p*-coumaroyl,4''-*Z*-*p*-coumaroyl)-rhamnoside, **compound 4** (acetone-*d*<sub>6</sub>, 400 MHz) in the range 8.0 to 5.4 ppm.

**Supplementary Figure S19.** <sup>1</sup>H NMR spectrum of kaempferol-3-*O*- $\alpha$ -L-(2''-*Z*-*p*-coumaroyl,4''-*E*-*p*-coumaroyl)-rhamnoside, **compound 5** (MeOD, 400 MHz).

**Supplementary Figure S20.** <sup>1</sup>H NMR spectrum of kaempferol-3-*O*- $\alpha$ -L-(2''-*Z*-*p*-coumaroyl,4''-*E*-*p*-coumaroyl)-rhamnoside, **compound 5** (MeOD, 400 MHz) in the range 8.0 to 5.4 ppm.

**Supplementary Figure S21.** <sup>1</sup>H NMR spectrum of kaempferol-3-O- $\alpha$ -L-(2",4"-di-Z-p-coumaroyl)-rhamnoside, **compound 6** (MeOD, 400 MHz).

**Supplementary Figure S22.** <sup>1</sup>H NMR spectrum of kaempferol-3-O- $\alpha$ -L-(2",4"-di-Z-p-coumaroyl)-rhamnoside, **compound 6** (MeOD, 400 MHz) in the range 7.9 to 5.5 ppm.

**Supplementary Figure S23.** <sup>1</sup>H NMR spectrum of kaempferol-3-O- $\alpha$ -L-(2",4"-di-Z-p-coumaroyl)-rhamnoside, **6** (acetone-*d*<sub>6</sub>, 400 MHz).

**Supplementary Figure S24.** <sup>1</sup>H NMR spectrum of kaempferol-3-O- $\alpha$ -L-(2",4"-di-Z-p-coumaroyl)-rhamnoside, **compound 6** (acetone-*d*<sub>6</sub>, 400 MHz) in the range 8.0 to 5.4 ppm.

**Supplementary Table S2.** MIC<sub>100</sub> values ( $\mu$ g/mL) determined for the essential oils carvacrol and thymol purified from *E. foeminea* hexane extract.

**Supplementary Table S3.** MIC<sub>100</sub> values ( $\mu$ g/mL) determined for the compounds kaempferol-3-O-(2",4"-di-E-p-coumaryl)- $\alpha$ -L-rhamno-piranoside, kaempferol-3-O-(2"-Z-p-coumaryl,4"-di-E-p-coumaryl)- $\alpha$ -L-rhamno-piranoside, kaempferol-3-O-(2"-E-p-coumaryl,4"-di-Z-p-coumaryl)- $\alpha$ -L-rhamno-piranoside and kaempferol-3-O-(2",4"-di-Z-p-coumaryl)- $\alpha$ -L-rhamno-piranoside purified from *E. foeminea* dichloromethane extract.

**Supplementary Figure S25.** Anti-biofilm activity of purified kaempferol-3-O-(2"-Z-p-coumaroyl,4"-E-p-coumaroyl)- $\alpha$ -L-rhamno-piranoside.

**Supplementary Figure S26.** Anti-biofilm activity of purified kaempferol-3-O-(2"-E-p-coumaroyl,4"-Z-p-coumaroyl)- $\alpha$ -L-rhamno-piranoside.

**Supplementary Figure S27.** Anti-biofilm activity of purified kaempferol-3-O-(2",4"-di-Z-p-coumaroyl)- $\alpha$ -L-rhamno-piranoside.

**Supplementary Table S4.** Details of the intermolecular interactions between the test ligand and *S. aureus* target enzymes tyrosyl tRNA synthetase and sortase A.

**Supplementary Table S1.** MIC<sub>100</sub> values (mg/mL) determined for fractions obtained upon extraction in hexane and two sequential steps of column chromatography.

| <b>MIC<sub>100</sub> (mg/mL) of fractions extracted in hexane</b> |          |          |          |          |          |          |          |
|-------------------------------------------------------------------|----------|----------|----------|----------|----------|----------|----------|
| <b>Bacterial strains</b>                                          | <b>1</b> | <b>2</b> | <b>3</b> | <b>4</b> | <b>5</b> | <b>6</b> | <b>7</b> |
| <i>S. aureus</i> ATCC 29213                                       | 2.5      | 2.5      | 2.5      | 0.313    | 0.313    | 2.5      | 1.25     |
| <i>E. coli</i> ATCC 25922                                         | 2.5      | 2.5      | 2.5      | 2.5      | 2.5      | 2.5      | 2.5      |
| <i>S. typhimurium</i> ATCC 14028                                  | 2.5      | 2.5      | 2.5      | 2.5      | 2.5      | 2.5      | 2.5      |

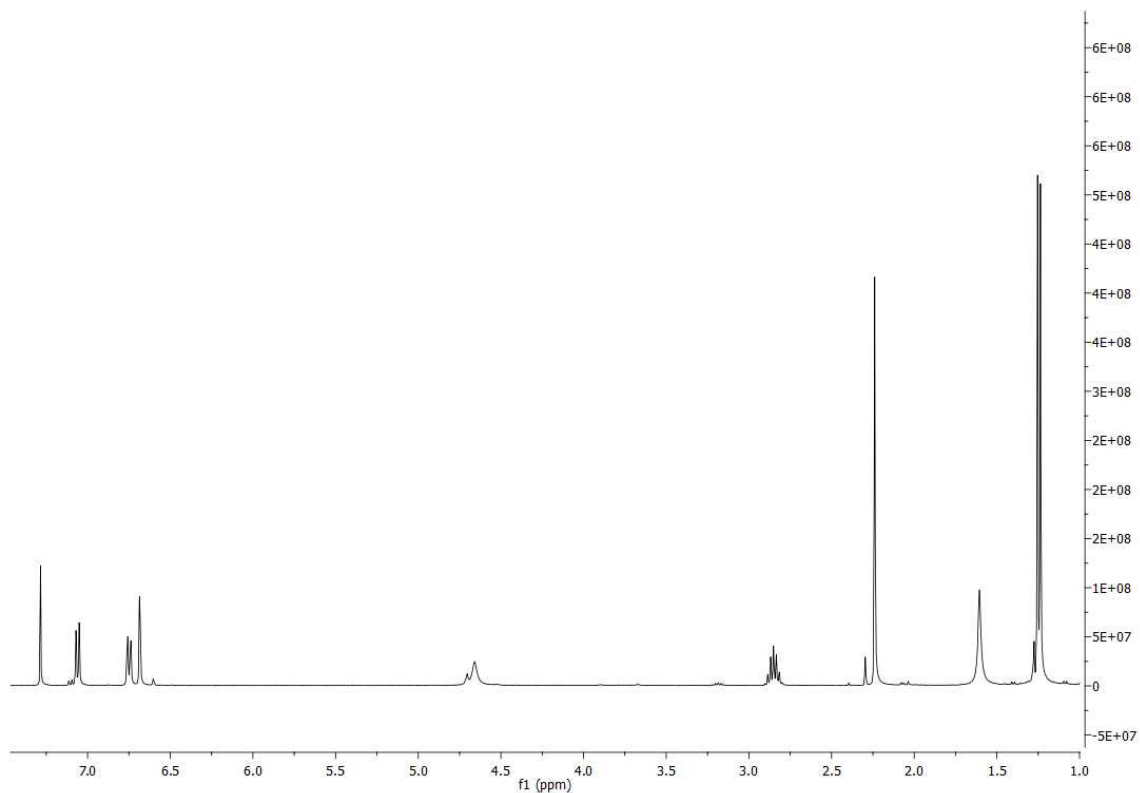

**Supplementary Figure S1.** <sup>1</sup>H NMR spectrum of carvacrol, **compound 1** (CDCl<sub>3</sub>, 400 MHz).

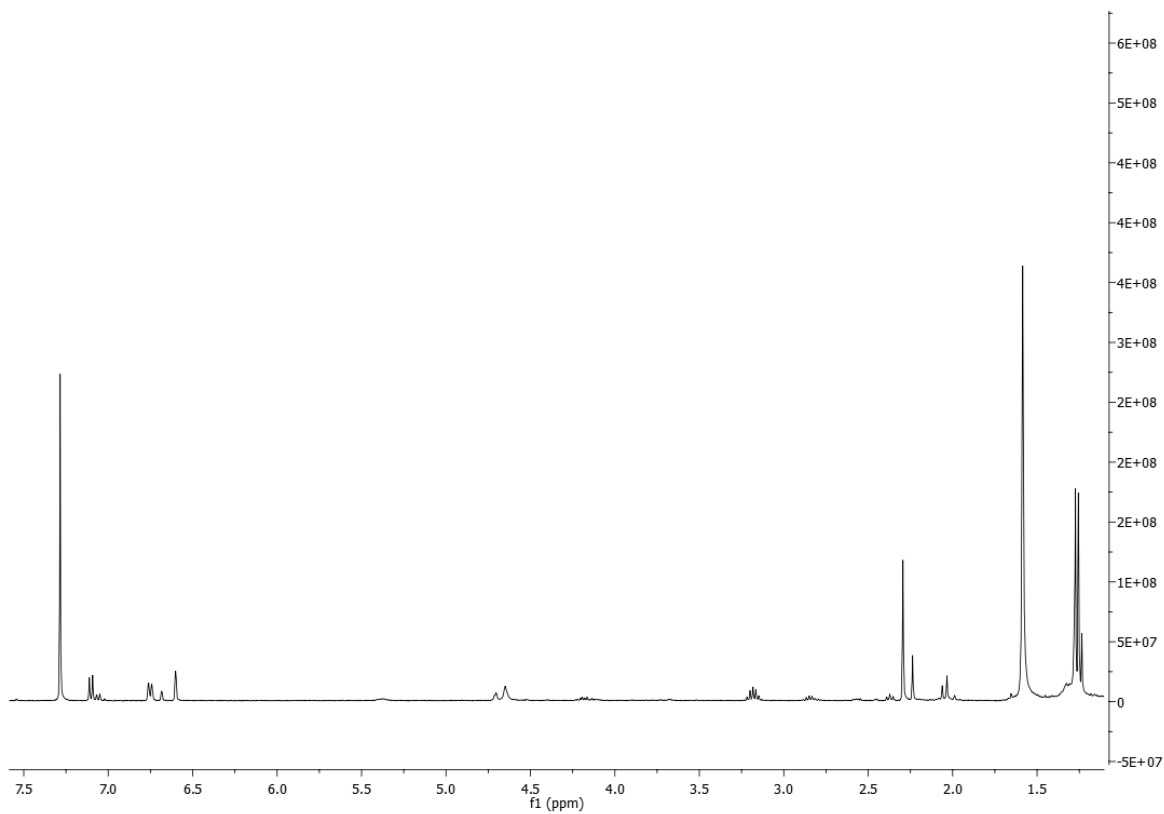

**Supplementary Figure S2.** <sup>1</sup>H NMR spectrum of thymol, **compound 2** (CDCl<sub>3</sub>, 400 MHz).

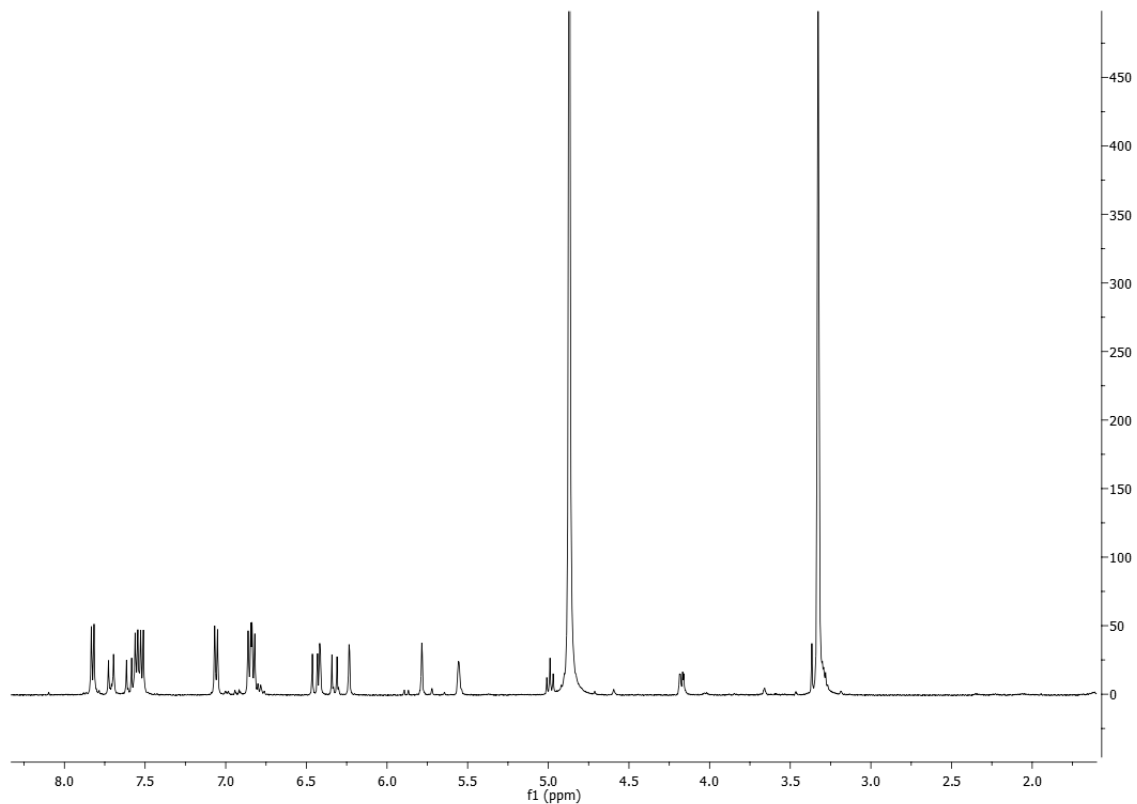

**Figure S3.**  $^1\text{H}$  NMR spectrum of kaempferol-3- $O$ - $\alpha$ -L-(2'',4'')-di-*E*-*p*-coumaroyl)-rhamnoside, **compound 3** (MeOD, 400 MHz).

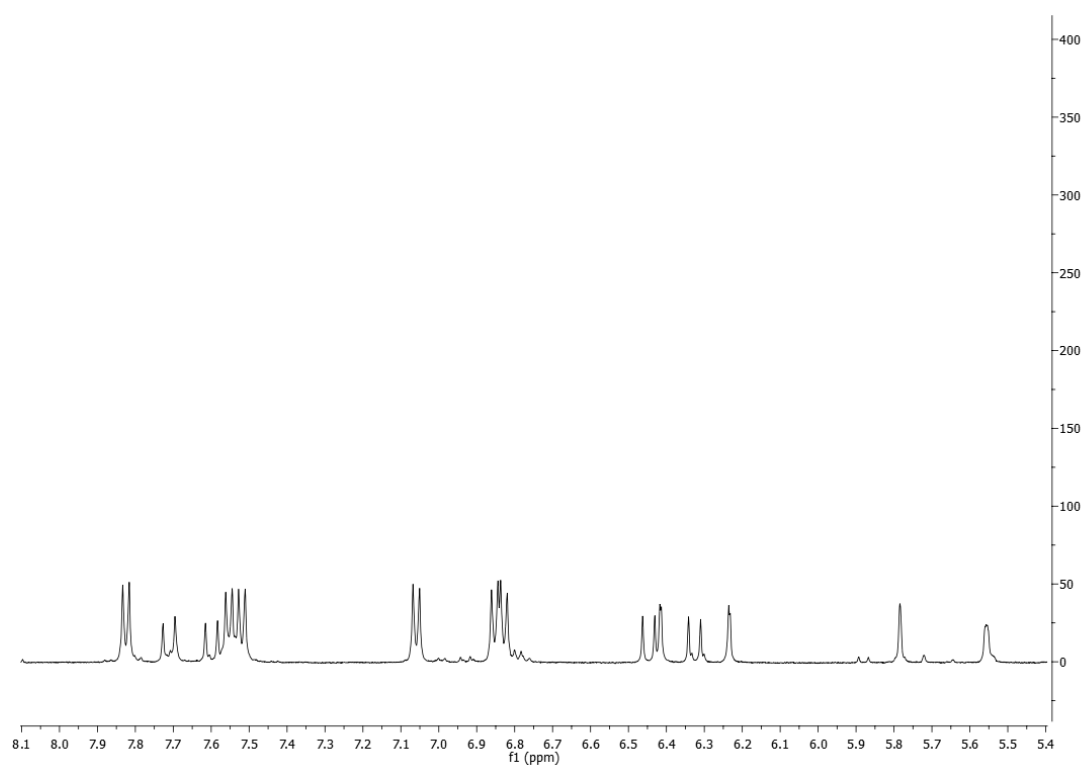

**Figure S4.**  $^1\text{H}$  NMR spectrum of kaempferol-3- $O$ - $\alpha$ -L-(2'',4'')-di-*E*-*p*-coumaroyl)-rhamnoside, **compound 3** (MeOD, 400 MHz) in the range 8.1 to 5.4 ppm.

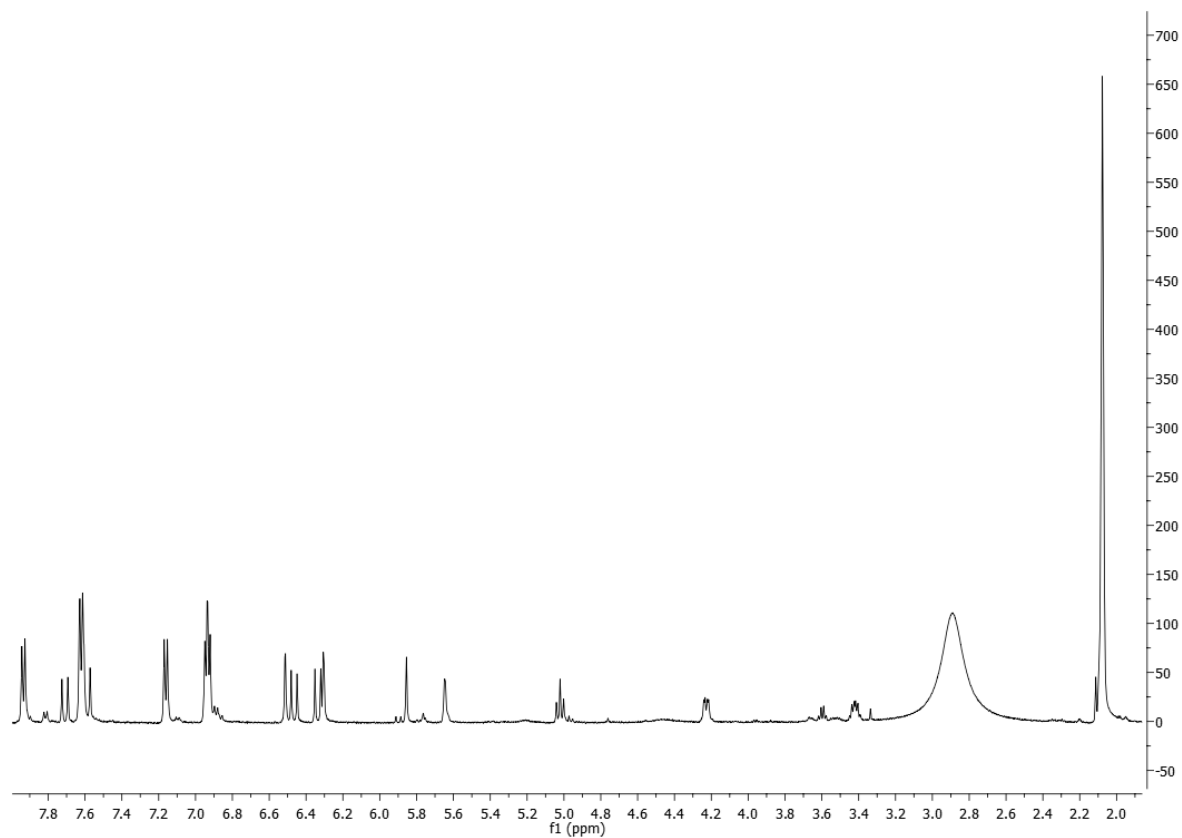

**Figure S5.**  $^1\text{H}$  NMR spectrum of kaempferol-3-*O*- $\alpha$ -L-(2'',4''-di-*E*-*p*-coumaroyl)-rhamnoside, **compound 3** (acetone- $d_6$ , 400 MHz).

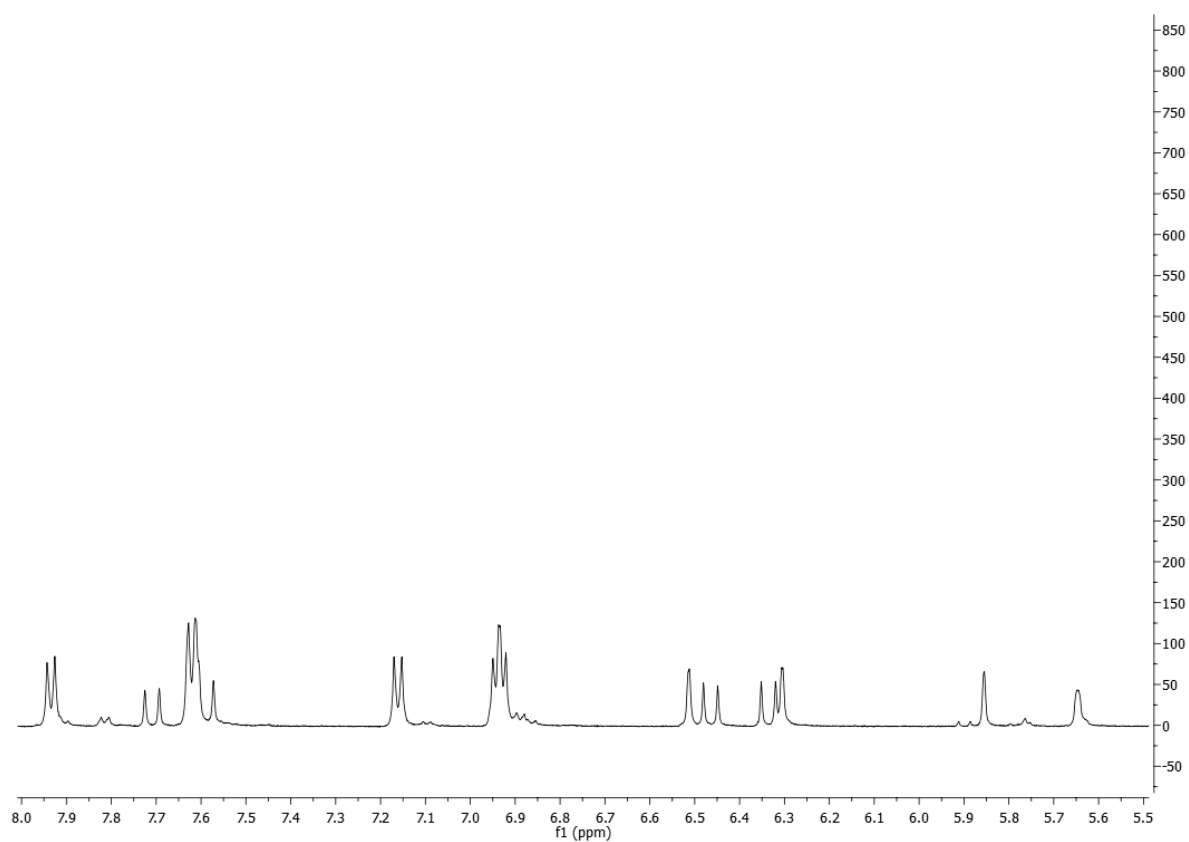

**Figure S6.**  $^1\text{H}$  NMR spectrum of kaempferol-3-*O*- $\alpha$ -L-(2'',4''-di-*E*-*p*-coumaroyl)-rhamnoside, **compound 3** (acetone- $d_6$ , 400 MHz) in the range 8.0 to 5.5 ppm.

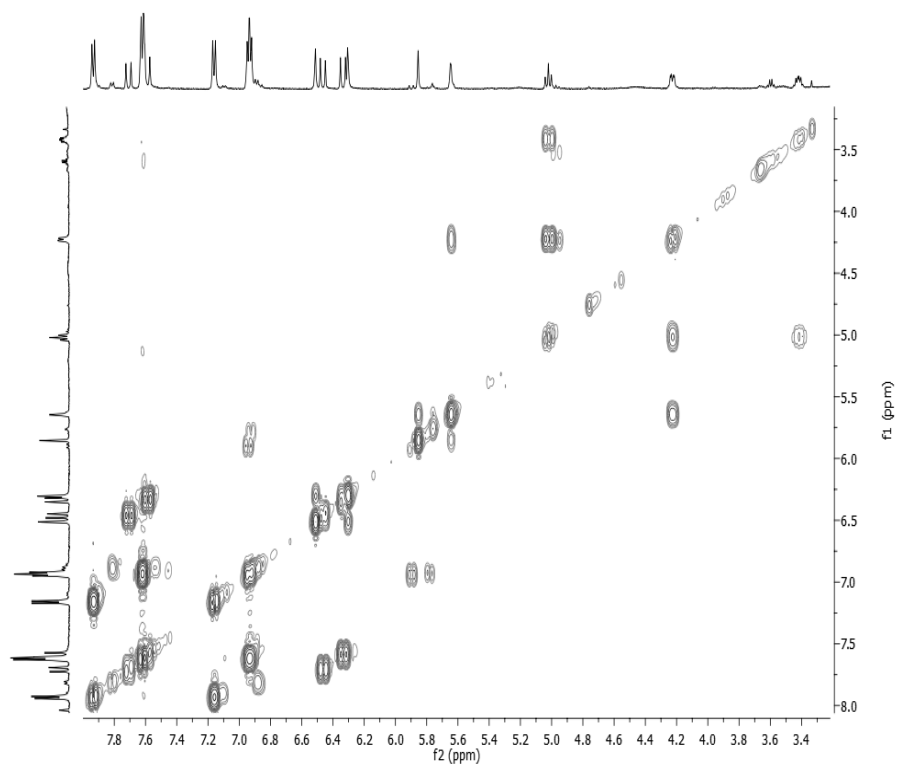

**Figure S7.** COSY spectrum of kaempferol-3-*O*- $\alpha$ -L-(2'',4''-di-*E*-*p*-coumaroyl)-rhamnoside, **compound 3** (acetone-*d*<sub>6</sub>, 400 MHz).

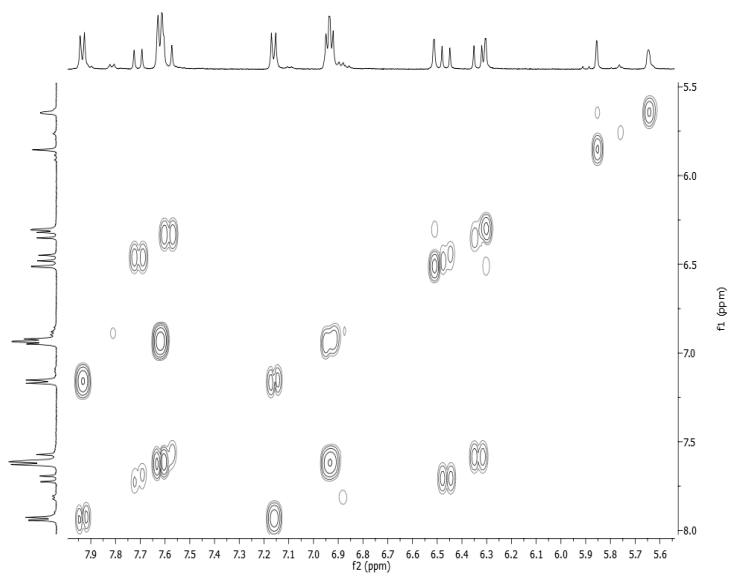

**Figure S8.** COSY spectrum of kaempferol-3-*O*- $\alpha$ -L-(2'',4''-di-*E*-*p*-coumaroyl)-rhamnoside, **compound 3** (acetone-*d*<sub>6</sub>, 400 MHz) in the range 8.0 to 5.6 ppm.



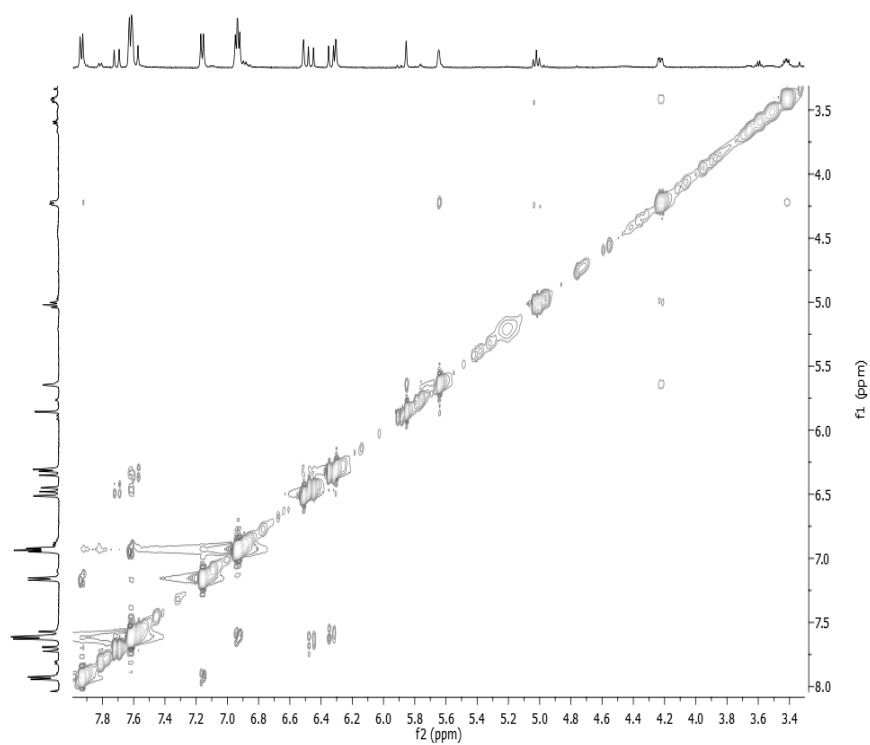

**Figure S9.** NOESY spectrum of kaempferol-3-*O*- $\alpha$ -L-(2'',4''-di-*E*-*p*-coumaroyl)-rhamnoside, **compound 3** (acetone-*d*<sub>6</sub>, 400 MHz).

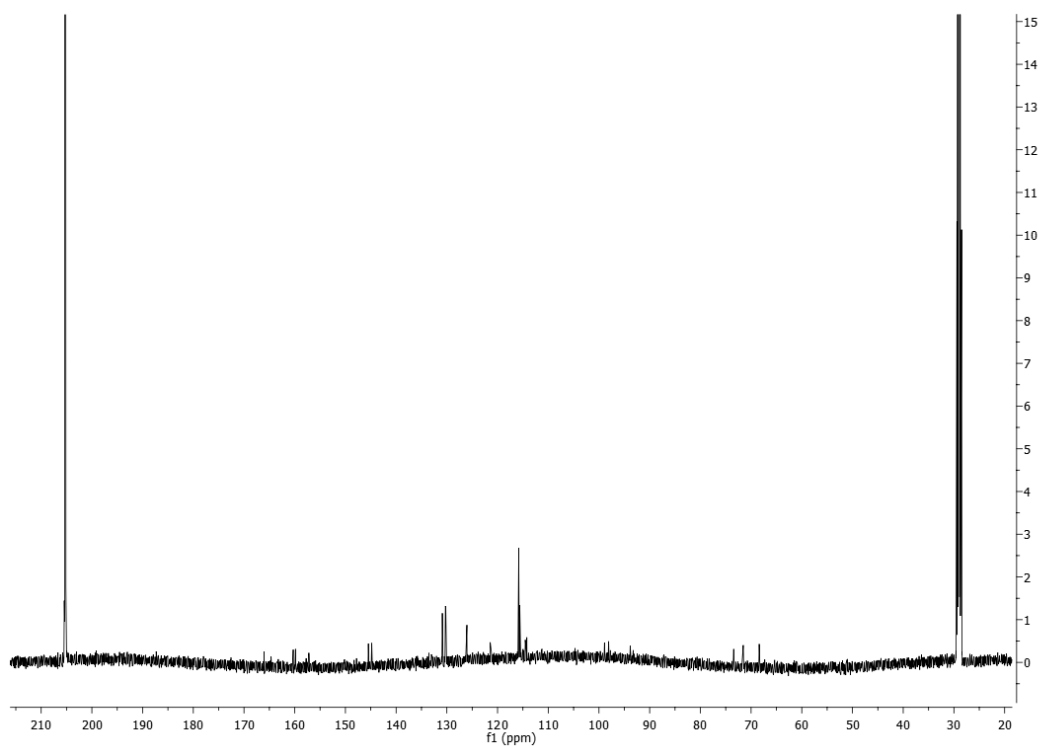

**Figure S10.** <sup>13</sup>C NMR spectrum of kaempferol-3-*O*- $\alpha$ -L-(2'',4''-di-*E*-*p*-coumaroyl)-rhamnoside, **compound 3** (acetone-*d*<sub>6</sub>, 400 MHz).

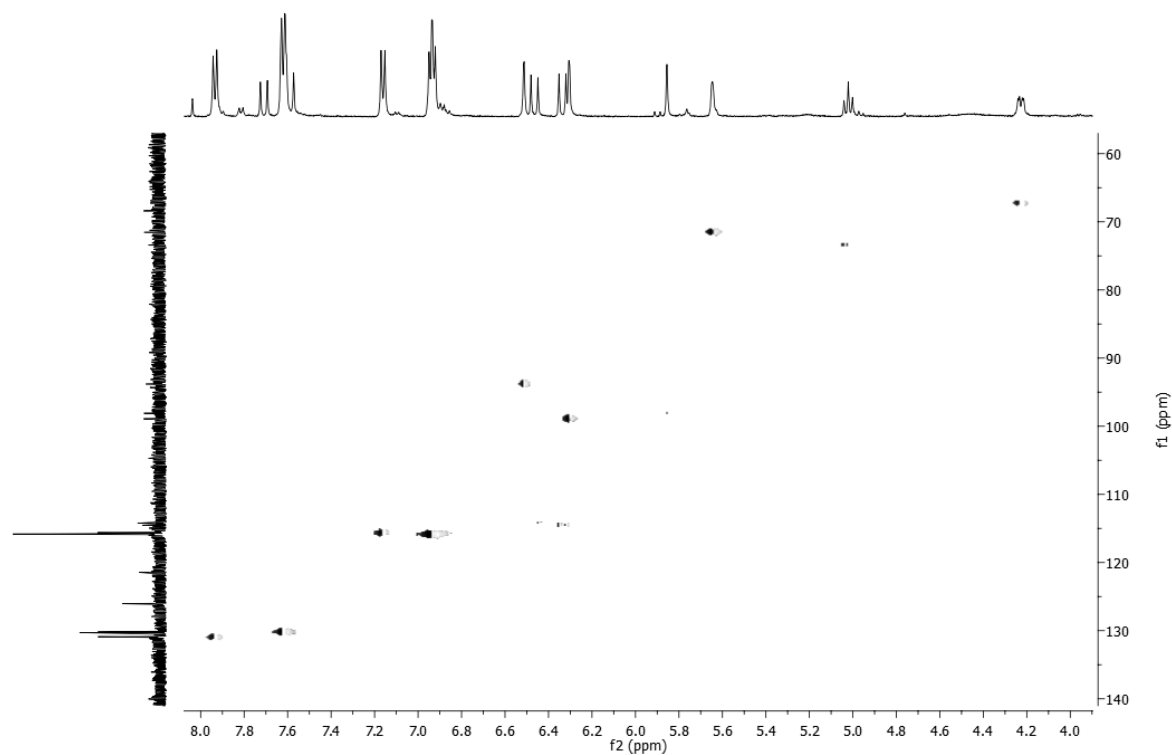

**Figure S11.** HSQC spectrum of kaempferol-3-*O*- $\alpha$ -L-(2'',4''-di-*E*-*p*-coumaroyl)-rhamnoside, **compound 3** (acetone-*d*<sub>6</sub>, 400 MHz).

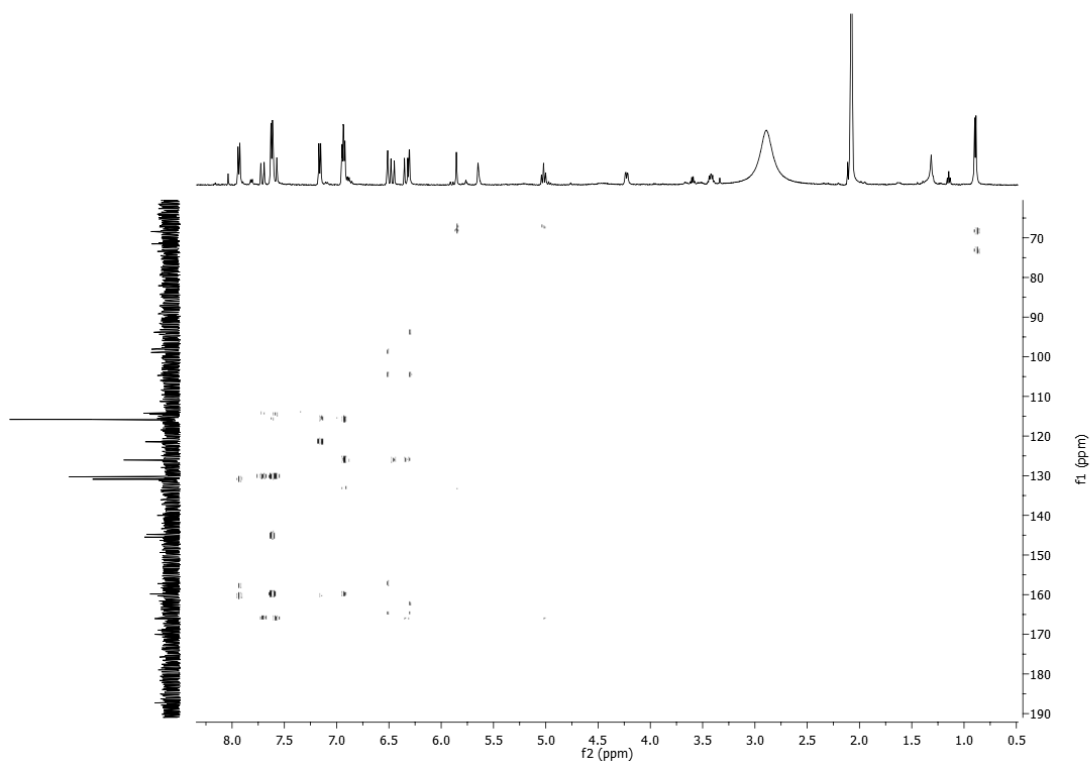

**Figure S12.** HMBC spectrum of kaempferol-3-*O*- $\alpha$ -L-(2'',4''-di-*E*-*p*-coumaroyl)-rhamnoside, **compound 3** (acetone-*d*<sub>6</sub>, 400 MHz).

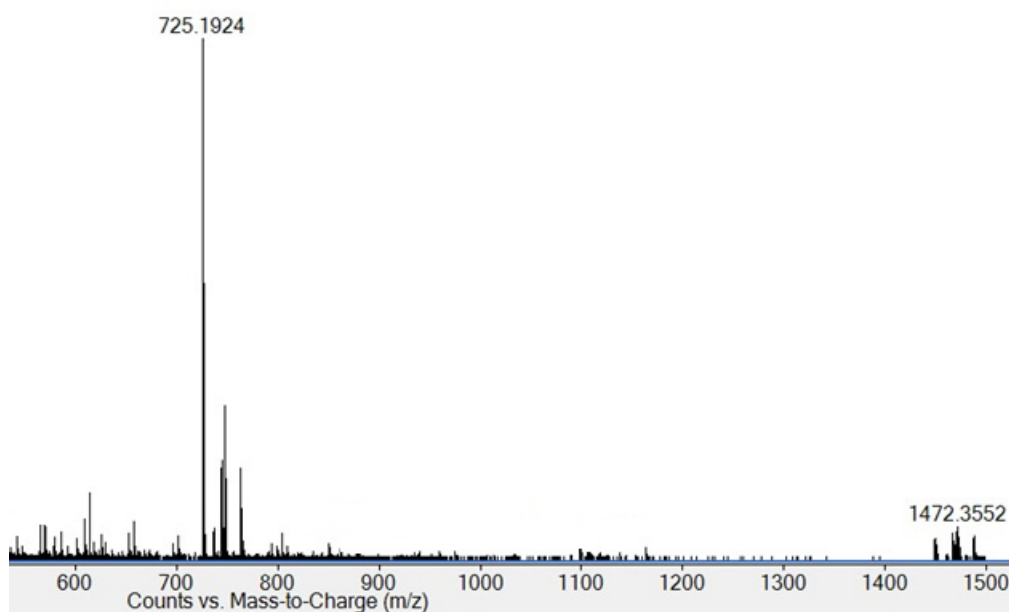

**Figure S13.** ESI MS spectrum of kaempferol-3-*O*- $\alpha$ -L-(2'',4''-di-*E*-*p*-coumaroyl)-rhamnoside, **compound 3** recorded in positive modality.

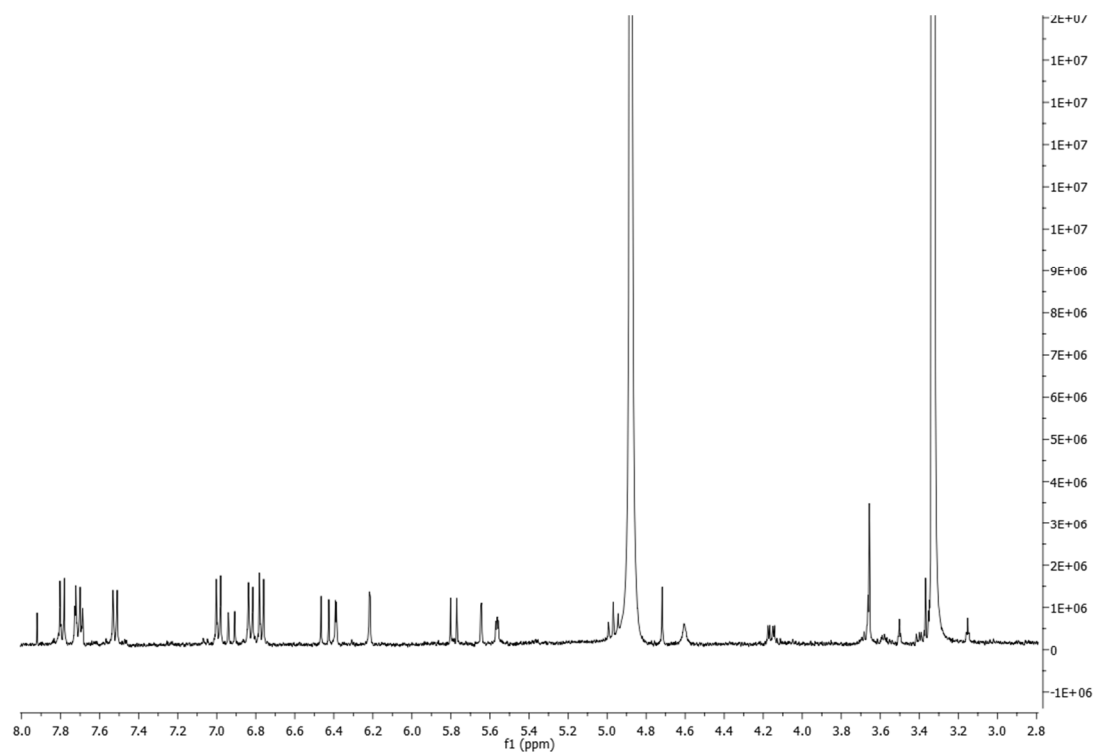

**Figure S14.** <sup>1</sup>H NMR spectrum of kaempferol-3-*O*- $\alpha$ -L-(2''-*E*-*p*-coumaroyl,4''-*Z*-*p*-coumaroyl)-rhamnoside, **compound 4** (MeOD, 400 MHz).

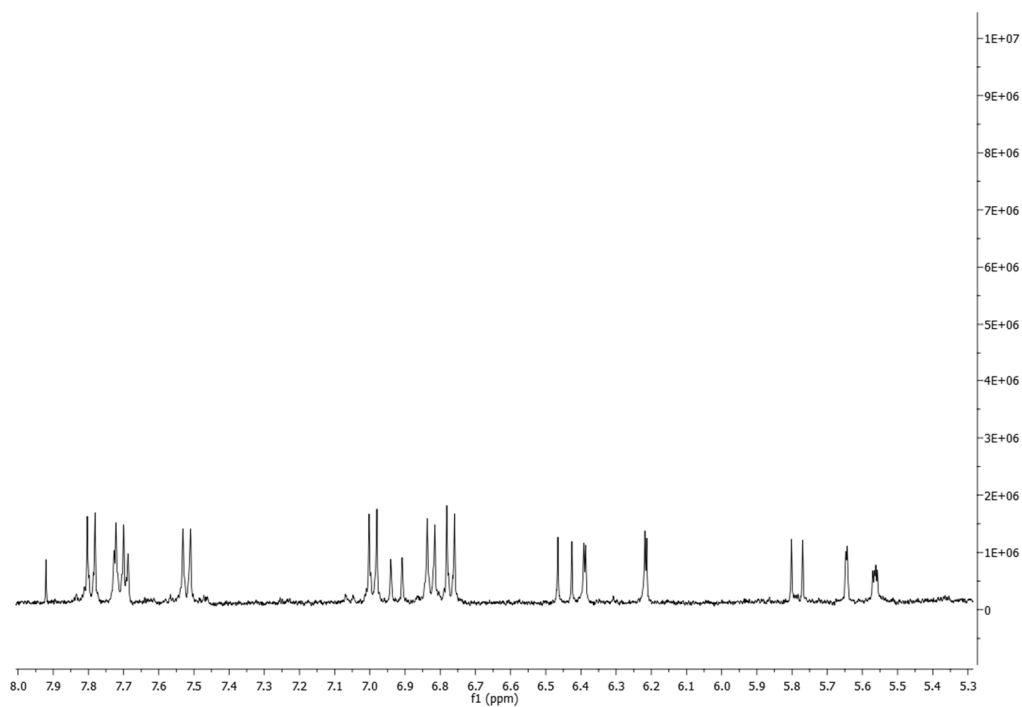

**Figure S15.**  $^1\text{H}$  NMR spectrum of kaempferol-3- $O$ - $\alpha$ -L-(2''- $E$ - $p$ -coumaroyl,4''- $Z$ - $p$ -coumaroyl)-rhamnoside, **compound 4** (MeOD, 400 MHz) in the range 8.0 to 5.3 ppm.

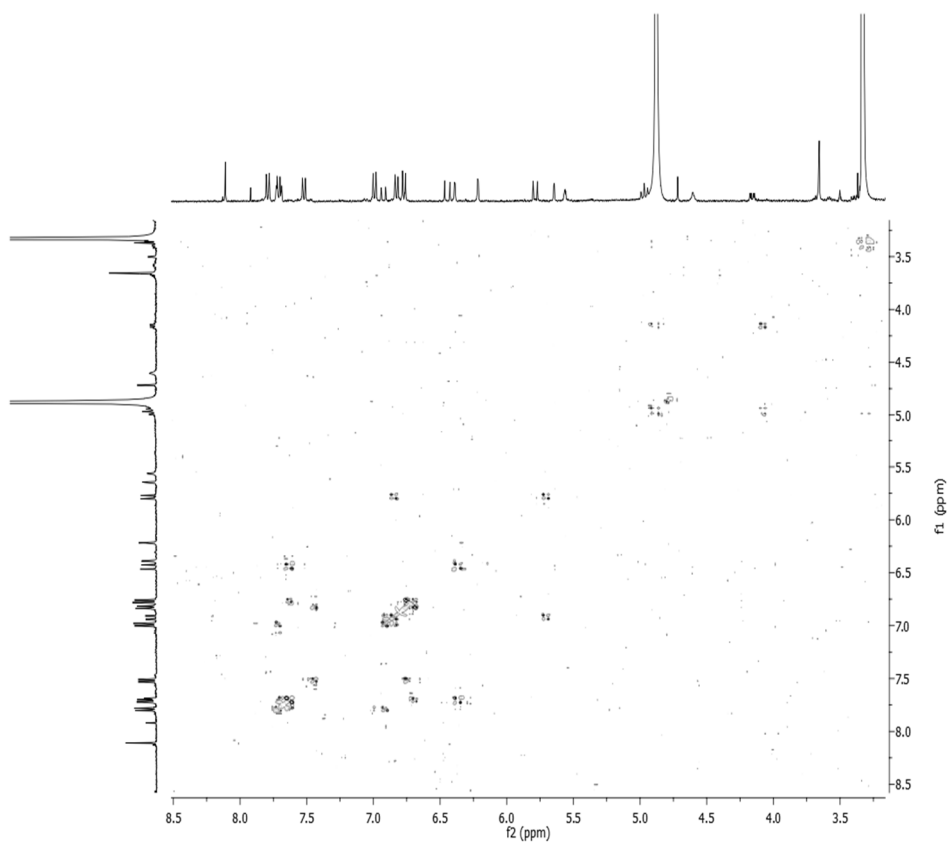

**Figure S16.** COSY spectrum of kaempferol-3- $O$ - $\alpha$ -L-(2''- $E$ - $p$ -coumaroyl,4''- $Z$ - $p$ -coumaroyl)-rhamnoside, **compound 4** (acetone- $d_6$ , 400 MHz).

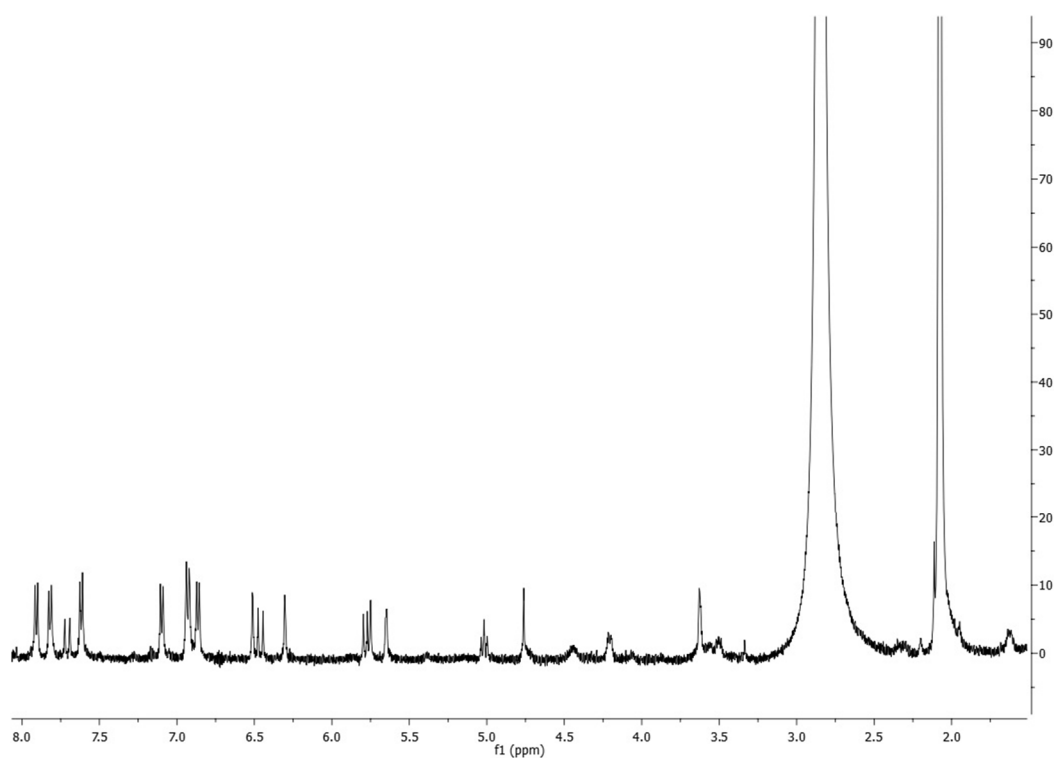

**Figure S17.**  $^1\text{H}$  NMR spectrum of kaempferol-3- $O$ - $\alpha$ -L-(2''- $E$ - $p$ -coumaroyl,4''- $Z$ - $p$ -coumaroyl)-rhamnoside, **compound 4** (acetone- $d_6$ , 400 MHz).

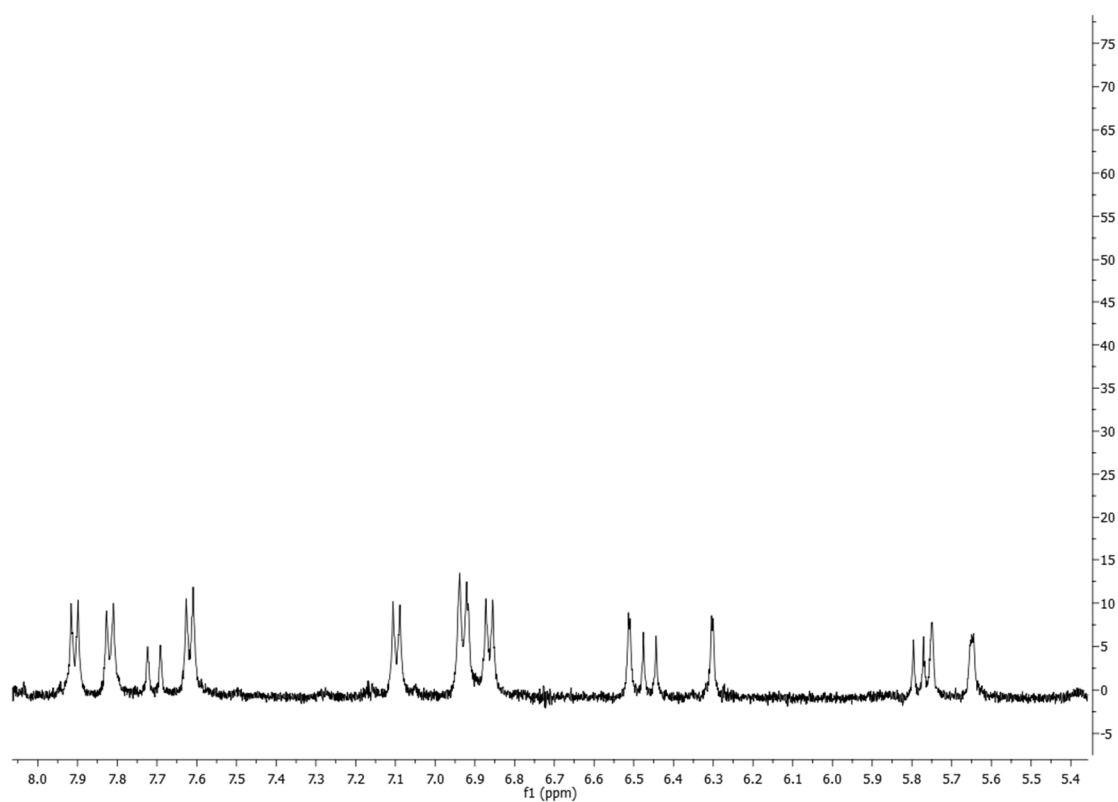

**Figure S18.**  $^1\text{H}$  NMR spectrum of kaempferol-3- $O$ - $\alpha$ -L-(2''- $E$ - $p$ -coumaroyl,4''- $Z$ - $p$ -coumaroyl)-rhamnoside, **compound 4** (acetone- $d_6$ , 400 MHz) in the range 8.0 to 5.4 ppm.

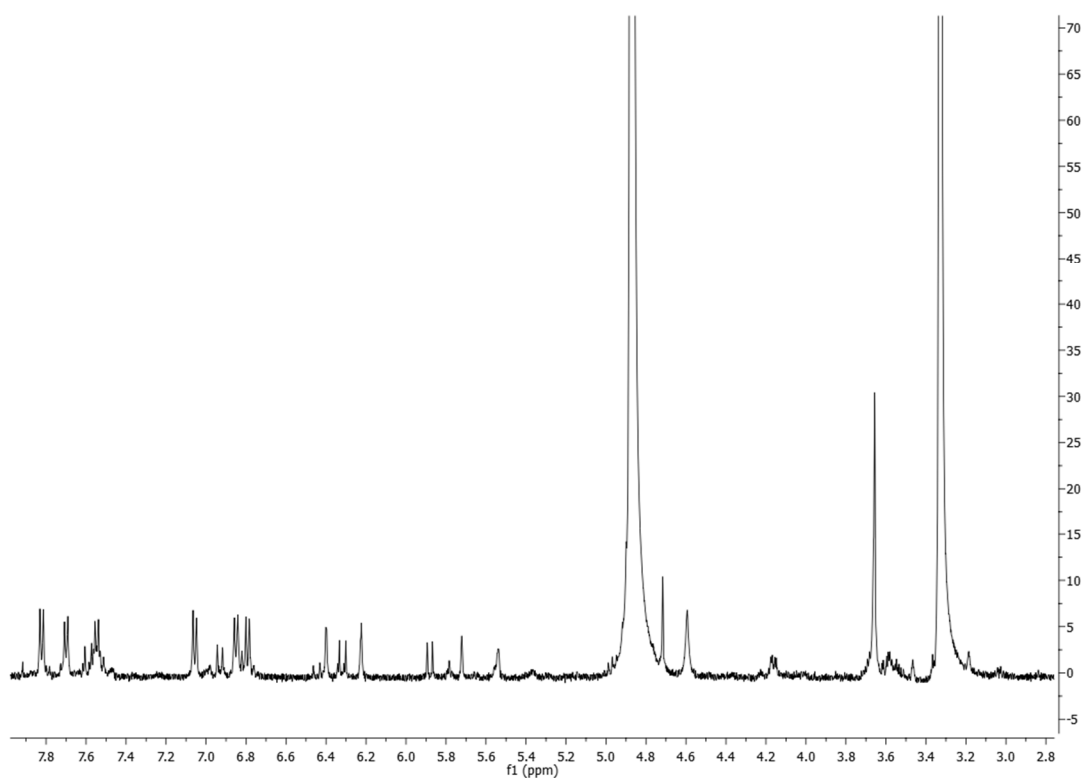

**Figure S19.**  $^1\text{H}$  NMR spectrum of kaempferol-3-*O*- $\alpha$ -L-(2''-*Z*-*p*-coumaroyl,4''-*E*-*p*-coumaroyl)-rhamnoside, **compound 5** (MeOD, 400 MHz).

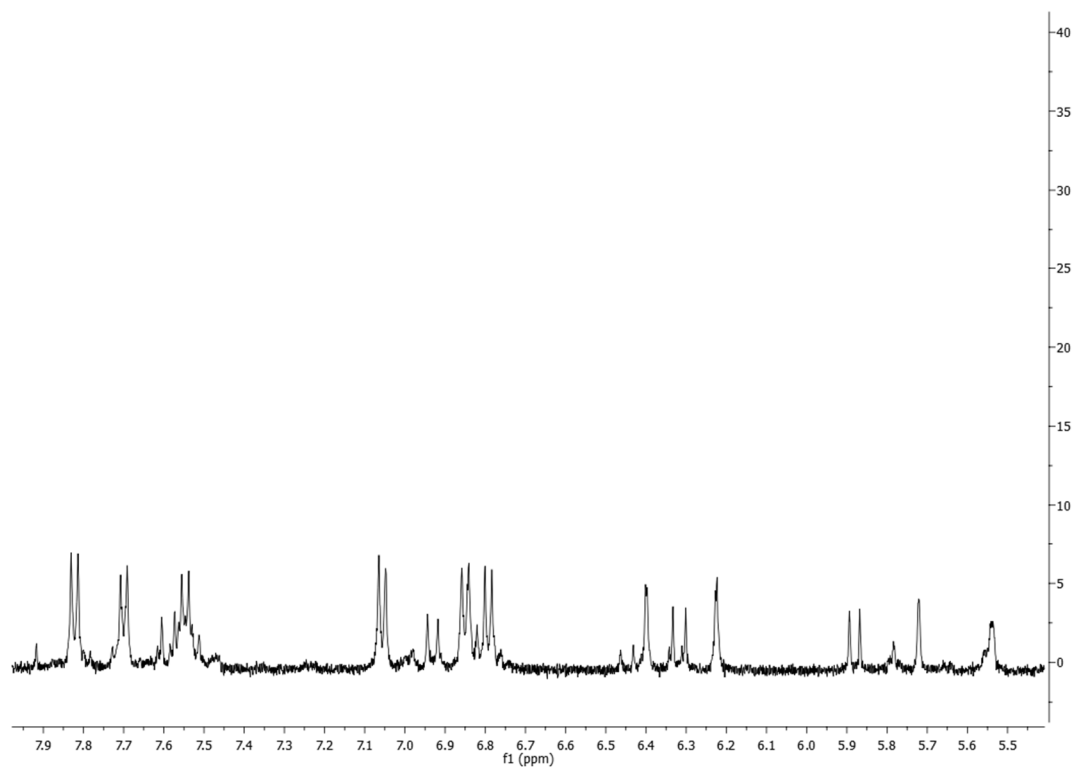

**Figure S20.**  $^1\text{H}$  NMR spectrum of kaempferol-3-*O*- $\alpha$ -L-(2''-*Z*-*p*-coumaroyl,4''-*E*-*p*-coumaroyl)-rhamnoside, **compound 5** (MeOD, 400 MHz) in the range 8.0 to 5.4 ppm.

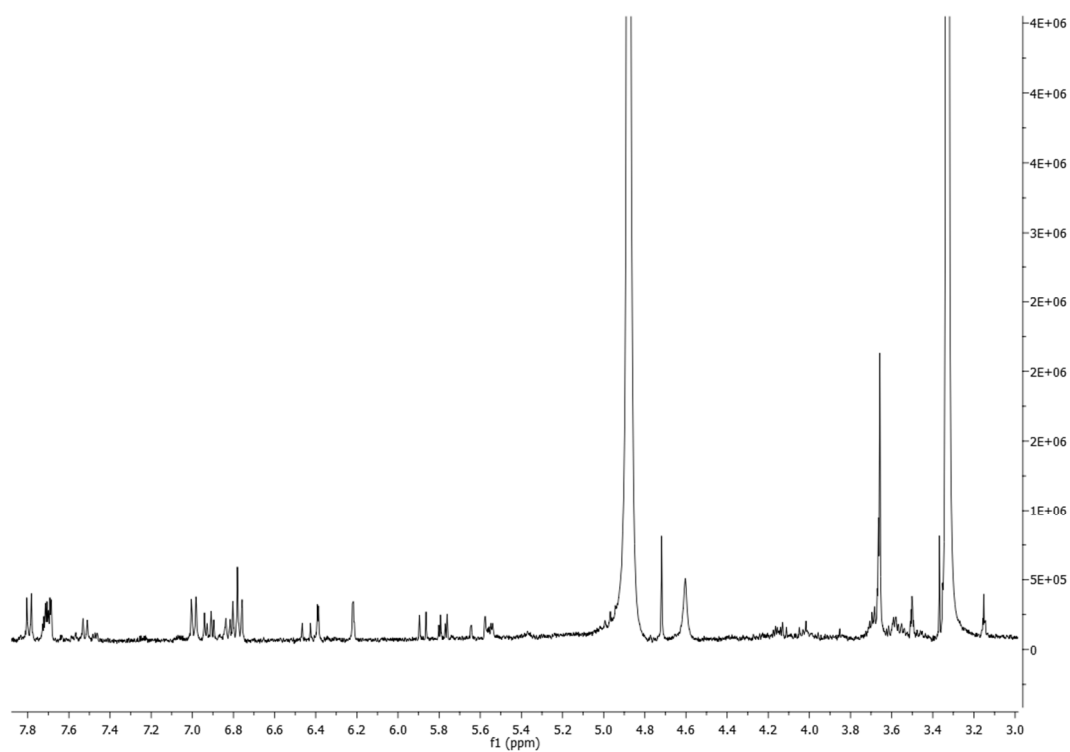

**Figure S21.**  $^1\text{H}$  NMR spectrum of kaempferol-3-*O*- $\alpha$ -L-(2'',4''-di-*Z*-*p*-coumaroyl)-rhamnoside, **compound 6** (MeOD, 400 MHz).

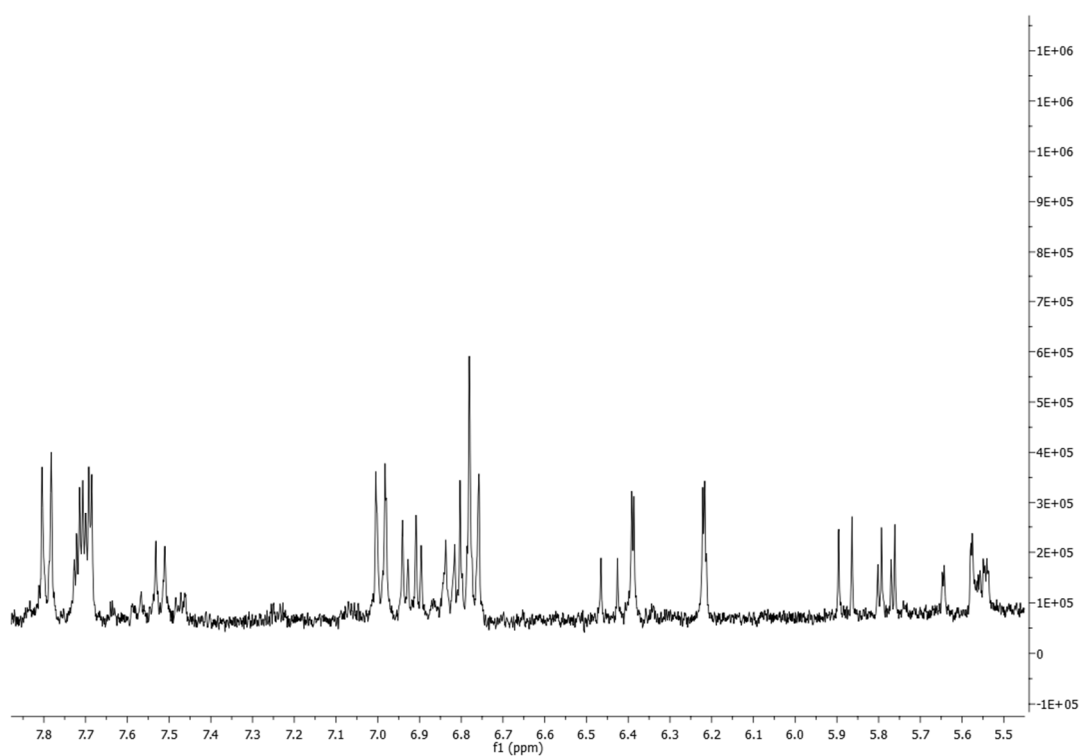

**Figure S22.**  $^1\text{H}$  NMR spectrum of kaempferol-3-*O*- $\alpha$ -L-(2'',4''-di-*Z*-*p*-coumaroyl)-rhamnoside, **compound 6** (MeOD, 400 MHz) in the range 7.9 to 5.5 ppm.

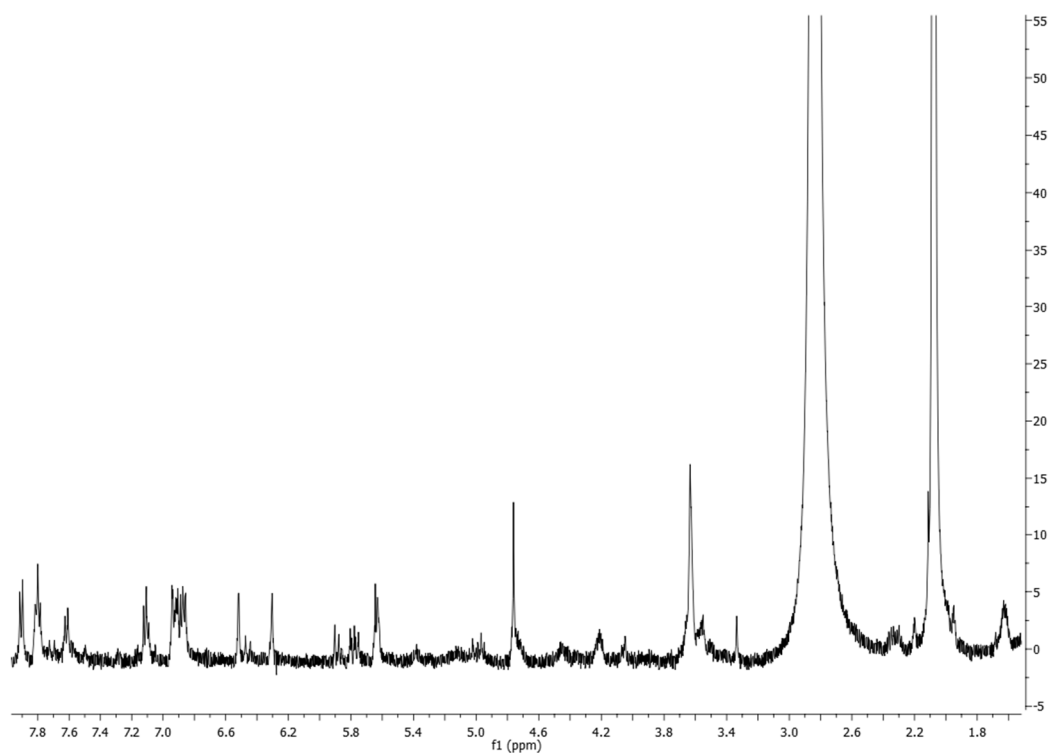

**Figure S23.**  $^1\text{H}$  NMR spectrum of kaempferol-3- $O$ - $\alpha$ -L-(2'',4''-di-Z- $p$ -coumaroyl)-rhamnoside, **compound 6** (acetone- $d_6$ , 400 MHz).

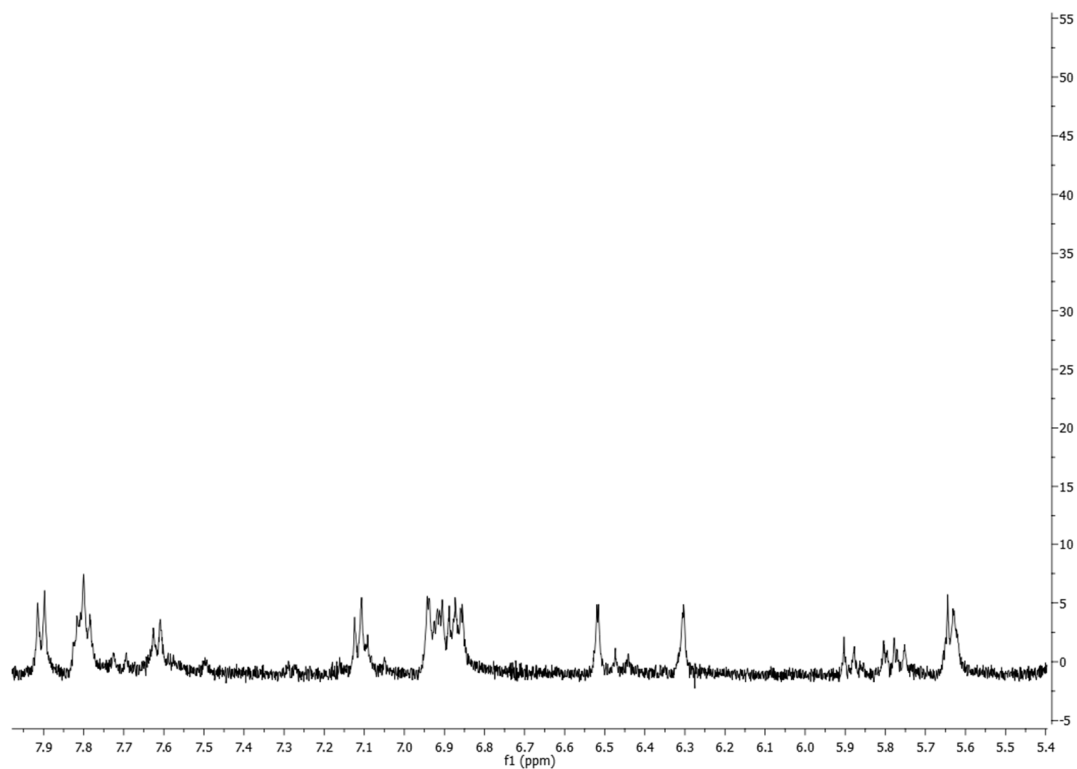

**Figure S24.**  $^1\text{H}$  NMR spectrum of kaempferol-3- $O$ - $\alpha$ -L-(2'',4''-di-Z- $p$ -coumaroyl)-rhamnoside, **compound 6** (acetone- $d_6$ , 400 MHz) in the range 8.0 to 5.4 ppm.



**Supplementary Table S2.** MIC<sub>100</sub> values (µg/mL) determined for the essential oils carvacrol and thymol purified from *E. foeminea* hexane extract.

|                                  | MIC <sub>100</sub> (µg/mL) |        |
|----------------------------------|----------------------------|--------|
| Gram-positive strains            | Carvacrol                  | Thymol |
| <i>S. aureus</i> ATCC 29213      | 100                        | 600    |
| <i>S. aureus</i> MRSA WKZ-1      | 50                         | 2,400  |
| <i>E. faecalis</i> ATCC 29212    | 100                        | 1,200  |
| Gram-negative Strains            |                            |        |
| <i>E. coli</i> ATCC 25922        | 200                        | 600    |
| <i>S. typhimurium</i> ATCC 14028 | 100                        | 300    |
| <i>A. baumannii</i> ATCC 17878   | 100                        | 1,200  |

**Supplementary Table S3.** MIC<sub>100</sub> values (µg/mL) determined for the compounds kaempferol-3-O-(2",4"-di-E-p-coumaryl)-α-L-rhamno-piranoside, kaempferol-3-O-(2"-Z-p-coumaryl,4"-di-E-p-coumaryl)-α-L-rhamno-piranoside, kaempferol-3-O-(2"-E- p-coumaryl,4"-di-Z-p-coumaryl)-α-L-rhamno-piranoside and kaempferol-3-O-(2",4"-di-Z-p-coumaryl)-α-L-rhamno-piranoside purified from *E. foeminea* dichloromethane extract.

|                                                                            | MIC <sub>100</sub> (µg/mL)          |                                   |
|----------------------------------------------------------------------------|-------------------------------------|-----------------------------------|
|                                                                            | <i>S. aureus</i><br>MRSA WKZ-1      | <i>A. baumannii</i><br>ATCC 17878 |
| kaempferol-3-O-(2",4"-di-E-p-coumaryl)-α-L-rhamno-piranoside               | 0.49                                | 1,000                             |
| kaempferol-3-O-(2"-Z-p-coumaryl,4"-di-E-p-coumaryl)-α-L-rhamno-piranoside  | >1,000<br>MIC <sub>95</sub> = 1,000 | 1,000                             |
| kaempferol-3-O-(2"-E- p-coumaryl,4"-di-Z-p-coumaryl)-α-L-rhamno-piranoside | >1,000<br>MIC <sub>98</sub> = 1,000 | 1,000                             |
| kaempferol-3-O-(2",4"-di-Z-p-coumaryl)-α-L-rhamno-piranoside               | >1,000<br>MIC <sub>98</sub> = 1,000 | 1,000                             |

### *S. aureus* MRSA WKZ-2

kaempferol-3-O-(2''-Z-p-coumaroyl,4''-E-p-coumaroyl)- $\alpha$ -L-rhamno-piranoside

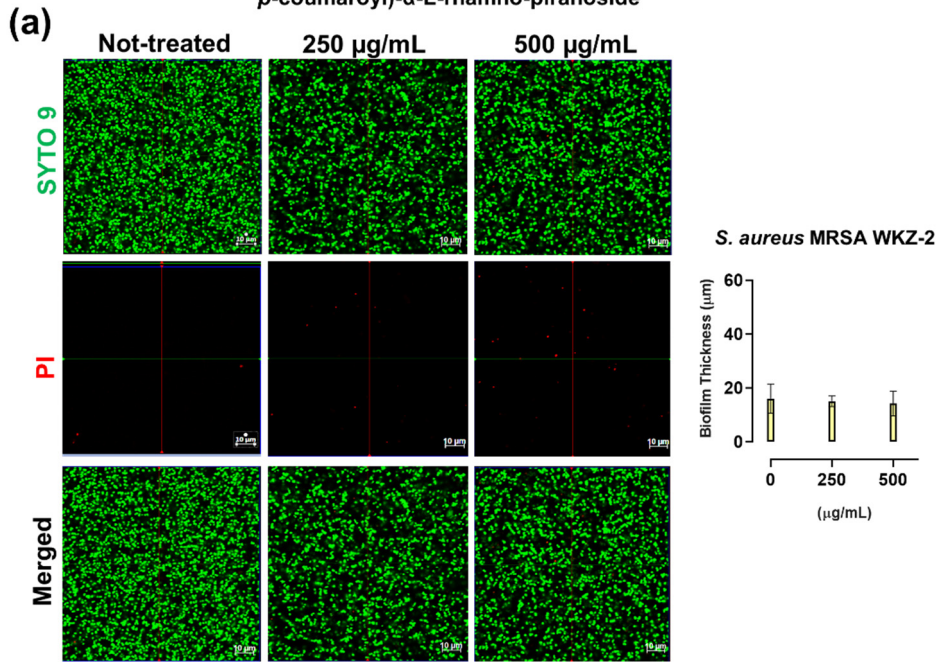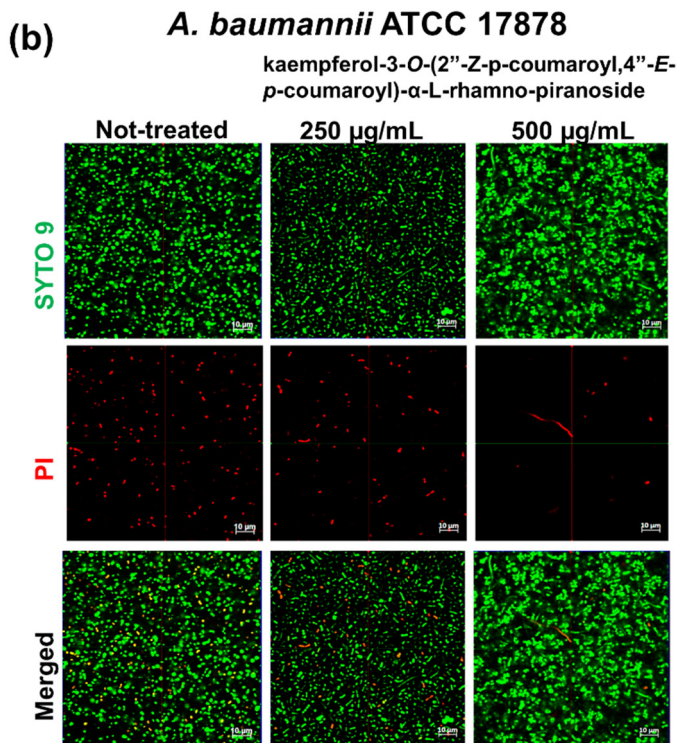

**Figure S25.** Anti-biofilm activity of purified kaempferol-3-O-(2''-Z-p-coumaroyl,4''-E-p-coumaroyl)- $\alpha$ -L-rhamno-piranoside. Effects of kaempferol-3-O-(2''-Z-p-coumaroyl,4''-E-p-coumaroyl)- $\alpha$ -L-rhamno-piranoside have been evaluated on biofilm formation in the case of *S. aureus* MRSA WKZ-2 (a), and *A. baumannii* ATCC 17878 (b). Biofilm cells were stained with LIVE/DEAD BacLight bacterial viability kit (Molecular Probes, Eugene, OR) containing a 1:1 mol/mol ratio of SYTO-9 (green fluorescence, all cells) and propidium iodide (PI; red fluorescence, dead cells). The biofilm images were obtained by confocal z-stack using Zen Lite 2.3 software. All the images were taken under identical conditions. Significant differences were indicated as (\* $P$  < 0.05) or (\*\* $P$  < 0.001) for treated versus control samples. Each experiment was carried out in triplicate.

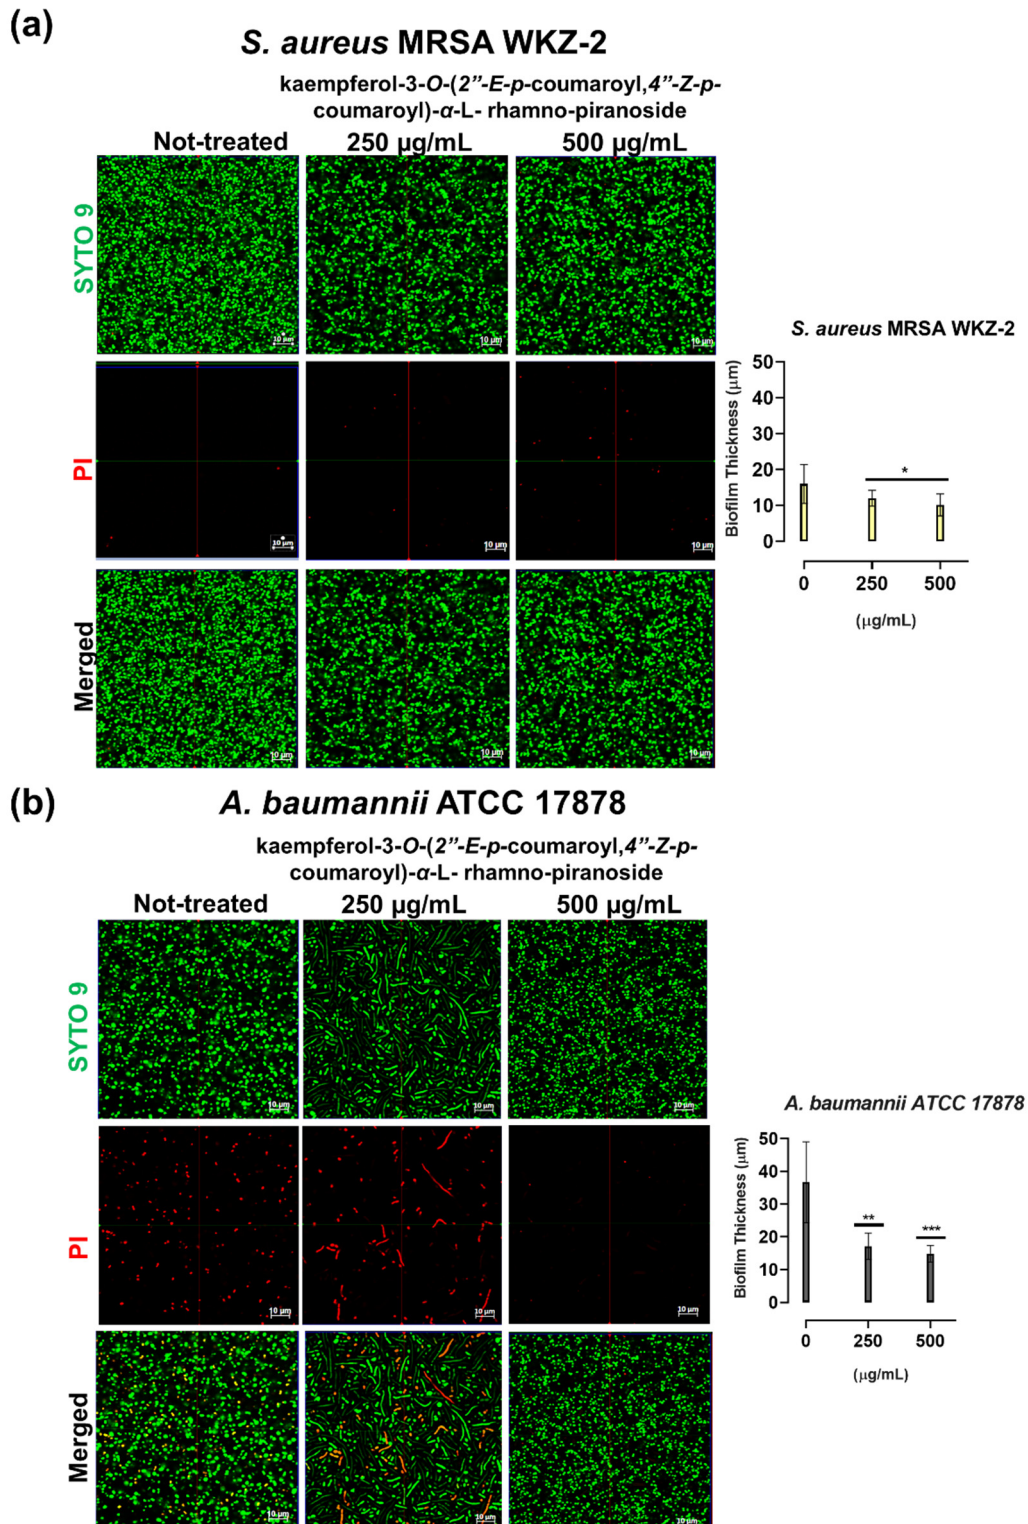

**Figure S26.** Anti-biofilm activity of purified kaempferol-3-O-(2''-E-p-coumaroyl,4''-Z-p-coumaroyl)- $\alpha$ -L-rhamno-piranoside. Effects of kaempferol-3-O-(2''-E-p-coumaroyl,4''-Z-p-coumaroyl)- $\alpha$ -L-rhamno-piranoside have been evaluated on biofilm formation in the case of *S. aureus* MRSA WKZ-2 **(a)**, and *A. baumannii* ATCC 17878 **(b)** by CLSM. Biofilm cells were stained with LIVE/DEAD BacLight bacterial viability kit (Molecular Probes, Eugene, OR) containing a 1:1 mol/mol ratio of SYTO-9 (green fluorescence, all cells) and propidium iodide (PI; red fluorescence, dead cells). The biofilm images were obtained by confocal z-stack using Zen Lite 2.3 software. All the images were taken under identical conditions. Significant differences were indicated as (\* $P$ < 0.05), (\*\* $P$ < 0.001) or (\*\*\*) $P$ < 0.0001) for treated *versus* control samples. Each experiment was carried out in triplicate.



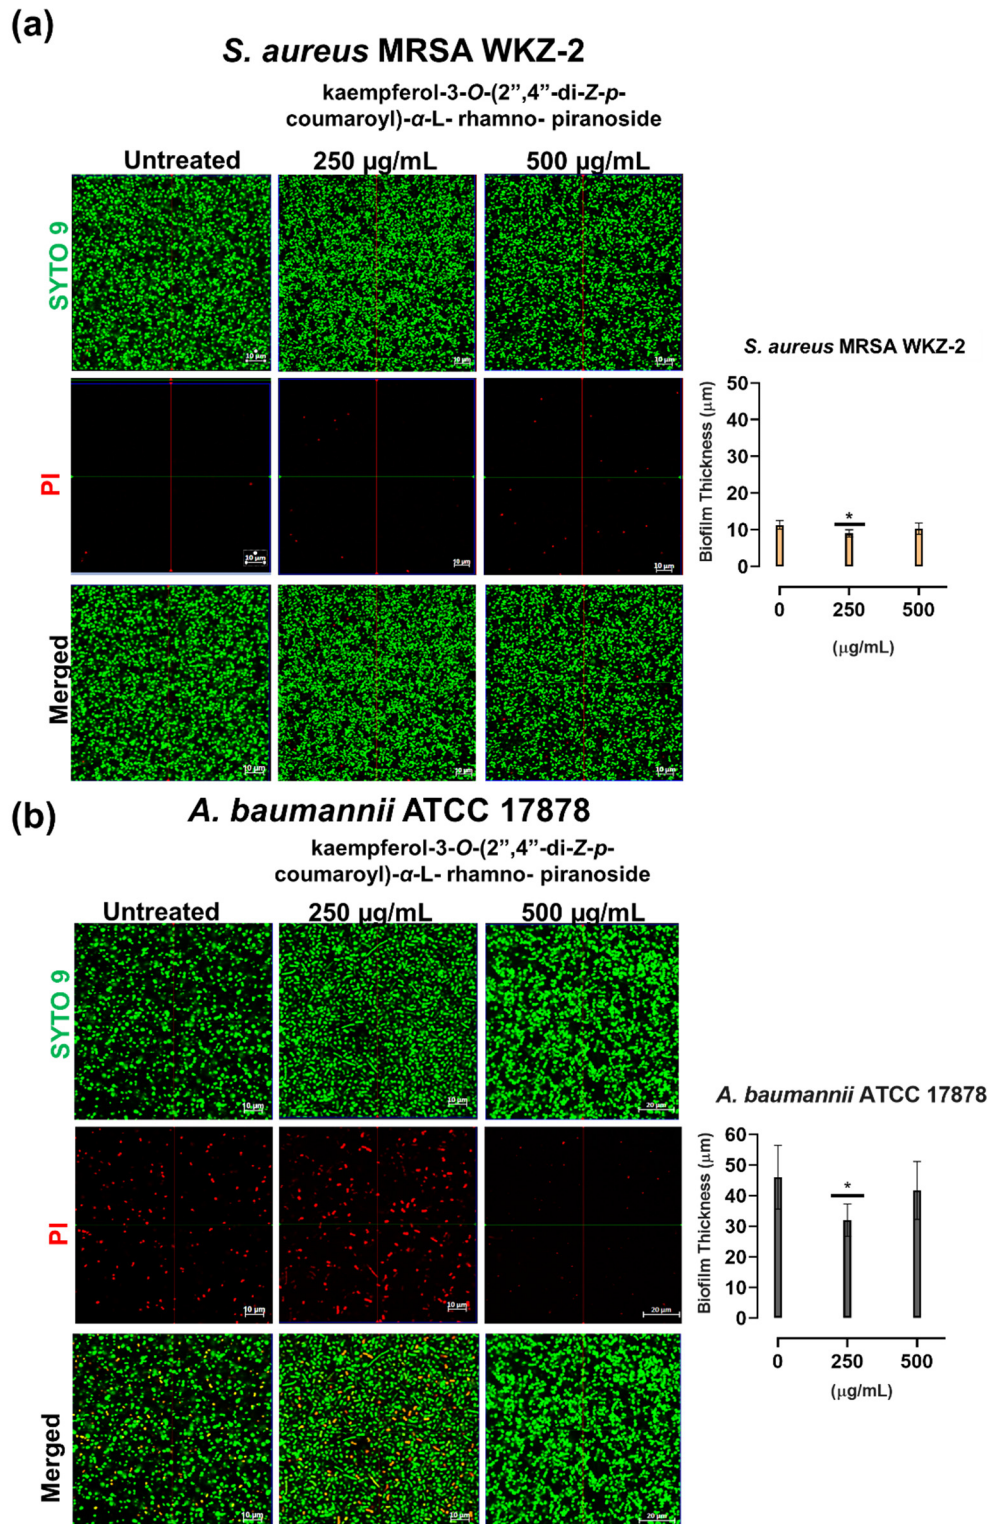

**Figure S27.** Anti-biofilm activity of purified kaempferol-3-O-(2'',4''-di-Z-p-coumaroyl)- $\alpha$ -L-rhamno-piranoside. Effects of kaempferol-3-O-(2'',4''-di-Z-p-coumaroyl)- $\alpha$ -L-rhamno-piranoside have been evaluated on biofilm formation in the case of *S. aureus* MRSA WKZ-2 (a), and *A. baumannii* ATCC 17878 (b) by CLSM. Biofilm cells were stained with LIVE/DEAD BacLight bacterial viability kit (Molecular Probes, Eugene, OR) containing a 1:1 mol/mol ratio of SYTO-9 (green fluorescence, all cells) and propidium iodide (PI; red fluorescence, dead cells). The biofilm images were obtained by confocal z-stack using Zen Lite 2.3 software. All the images were taken under identical conditions. Significant differences were indicated as (\* $P < 0.05$ ) for treated versus control samples. Each experiment was carried out in triplicate.

**Supplementary Table S4.** Details of the intermolecular interactions between the test ligand and *S. aureus* target enzymes tyrosyl tRNA synthetase and sortase A.

| Interaction between antimicrobial compound and tyrosyl tRNA synthetase |                      |                 | Interaction between antimicrobial compound and sortase A |                     |                 |
|------------------------------------------------------------------------|----------------------|-----------------|----------------------------------------------------------|---------------------|-----------------|
| Interacting amino acid                                                 | Type of interaction  | Bond length (Å) | Interacting amino acid                                   | Type of interaction | Bond length (Å) |
| His 50                                                                 | Carbon-hydrogen bond | 3.57            | Val 168                                                  | Hydrogen bond       | 2.21            |
| His 47                                                                 | Pi-Sigma             | 3.92            | Arg 197                                                  | Hydrogen bond       | 2.35            |
| His 47                                                                 | Pi-Pi T shaped       | 5.02            | Ala 92                                                   | Hydrogen bond       | 2.66            |
| His 47                                                                 | Pi-Pi T shaped       | 4.96            | Val 168                                                  | Hydrogen bond       | 2.70            |
| Gly 38                                                                 | Amide Pi Stacked     | 3.52            | Thr 180                                                  | Hydrogen bond       | 2.49            |
| Ala 43                                                                 | Pi -Alkyl            | 5.00            | Val 193                                                  | Pi-Sigma            | 3.79            |
| Leu 223                                                                | Pi -Alkyl            | 5.37            | Ala 92                                                   | Pi-alkyl            | 5.11            |
|                                                                        |                      |                 | Ala 104                                                  | Pi-Alkyl            | 5.07            |
|                                                                        |                      |                 | Val 168                                                  | Pi-Alkyl            | 4.65            |
|                                                                        |                      |                 | Ile 199                                                  | Pi-Alkyl            | 4.54            |
